# Supplementary material for: Hydrogenation of BHMF with controllable selectivity to tetrahydropyranone and 1-hydroxy-2,5-hexanedione under atmospheric H2pressure
Source: Royal Society of Chemistry journal article supplement (doi:10.1039/d2gc04637g), 2023-01-01
Supplement: d2gc04637g1.pdf [file d2gc04637g1.pdf]

## Electronic Supplementary Information

**Ying Duan** <sup>\*a,b</sup>, **Chi Zhang** <sup>a,c</sup>, **Dongsheng Deng** <sup>a</sup>, **Dong Sui** <sup>a</sup>, **Xiaohan Gao** <sup>c</sup> and **Yanliang Yang** <sup>\*a</sup>

- a. Henan Key Laboratory of Function-Oriented Porous Materials, College of Chemistry and Chemical Engineering, Luoyang Normal University, Luoyang 471934, China. yangyli@mail.ustc.edu.cn
- b. College of Food and Drug, Luoyang Normal University, Luoyang 471934, China. duanying@mail.ustc.edu.cn
- c. School of Petrochemical Engineering, Liaoning Petrochemical University, Liaoning Fushun, 113001, China.

Methods for theoretical calculation:

The first-principles [1,2] was employed to perform all Spin-polarization density functional theory (DFT) calculations within the generalized gradient approximation (GGA) using the Perdew-Burke-Ernzerhof (PBE) formulation. The projected augmented wave (PAW) potentials was chosen to describe the ionic cores and take valence electrons into account using a plane wave basis set with a kinetic energy cutoff of 450 eV. Partial occupancies of the Kohn–Sham orbitals were allowed using the Gaussian smearing method and a width of 0.05 eV. The electronic energy was considered self-consistent when the energy change was smaller than  $10^{-5}$  eV. A geometry optimization was considered convergent when the energy change was smaller than 0.05 eV  $\text{\AA}^{-1}$ . The vacuum spacing in a direction perpendicular to the plane of the structure is 15  $\text{\AA}$ . The Brillouin zone integration is performed using  $3 \times 3 \times 1$  Monkhorst-Pack k-point sampling for a structure. Finally, the adsorption energies( $E_{ads}$ ) were calculated as  $E_{ads} = E_{ad/sub} - E_{ad} - E_{sub}$ , where  $E_{ad/sub}$ ,  $E_{ad}$ , and  $E_{sub}$  are the total energies of the optimized adsorbate/substrate system, the adsorbate in the structure, and the clean substrate, respectively. The free energy was calculated using the equation:

$$G = E + ZPE - TS$$

where G, E, ZPE and TS are the free energy, total energy from DFT calculations, zero point energy and entropic contributions, respectively. In our calculation, the U correction had been set as 3.39 eV for Rh atoms in our systems.

Table S1 The conversion of BHMF on different catalysts.

| Entry | Catalyst | Cat. (mg) | Conv. (%) | Distribution of products (%) |      |     |        | C.B. (%) |
|-------|----------|-----------|-----------|------------------------------|------|-----|--------|----------|
|       |          |           |           | HD                           | MDPO | HHD | Others |          |
| 1     | Ru/C     | 10        | 100       | 1                            | 1    | 52  | 46     | 54       |
| 2     | Rh/C     | 10        | 85        | 2                            | 13   | 69  | 16     | 86       |
| 3     | Pd/C     | 5         | 99        | 6                            | 68   | 19  | 7      | 93       |
| 4     | Pt/C     | 5         | 88        | 2                            | 2    | 23  | 73     | 36       |

Reaction conditions: BHMF (128.0 mg, 1 mmol), H<sub>3</sub>PO<sub>4</sub> (4 mL, 0.5 mol L<sup>-1</sup>), H<sub>2</sub> 1 atm, 333 K. C.B. carbon balance.

Table S2 Effect of acids on the hydrogenation of BHMF on Pd/C and Rh/C<sup>a</sup>.

| Entry | Cat. | Acid                           | pH <sup>b</sup> | Conv. (%) | Selectivity (%) |      |     |        | C.B. (%) |
|-------|------|--------------------------------|-----------------|-----------|-----------------|------|-----|--------|----------|
|       |      |                                |                 |           | HD              | MDPO | HHD | Others |          |
| 1     |      | H <sub>3</sub> PO <sub>4</sub> | 1.83            | 99        | 6               | 68   | 19  | 7      | 93       |
| 2     | Pd/C | HCl                            | 1.81            | 87        | 12              | 47   | 18  | 23     | 80       |
| 3     |      | H <sub>2</sub> SO <sub>4</sub> | 1.86            | 93        | 10              | 52   | 16  | 22     | 80       |
| 5     |      | H <sub>3</sub> PO <sub>4</sub> | 1.83            | 100       | 2               | 10   | 72  | 16     | 84       |
| 6     | Rh/C | HCl                            | 1.81            | 98        | 7               | 13   | 55  | 25     | 76       |
| 8     |      | H <sub>2</sub> SO <sub>4</sub> | 1.86            | 100       | 10              | 17   | 58  | 15     | 85       |

<sup>a</sup> reaction conditions: Pd/C (5 mg), BHMF (128.0 mg, 1 mmol), Acid (4 mL), H<sub>2</sub> 1 atm, 333 K; Rh/C (10 mg), BHMF (128.0 mg, 1 mmol), acid (4 mL), H<sub>2</sub> 1 atm, 363 K. <sup>b</sup> the pH was determined by a pH meter. C.B. carbon balance.

Table S3 The content of metal in the sample determined by ICP-OES .

| Entry | Catalyst   | Metal content (wt.%) |
|-------|------------|----------------------|
| 1     | Fresh Pd/C | 5.04                 |
| 2     | Spent Pd/C | 4.85                 |
| 3     | Fresh Rh/C | 4.97                 |
| 4     | Spent Rh/C | 4.86                 |

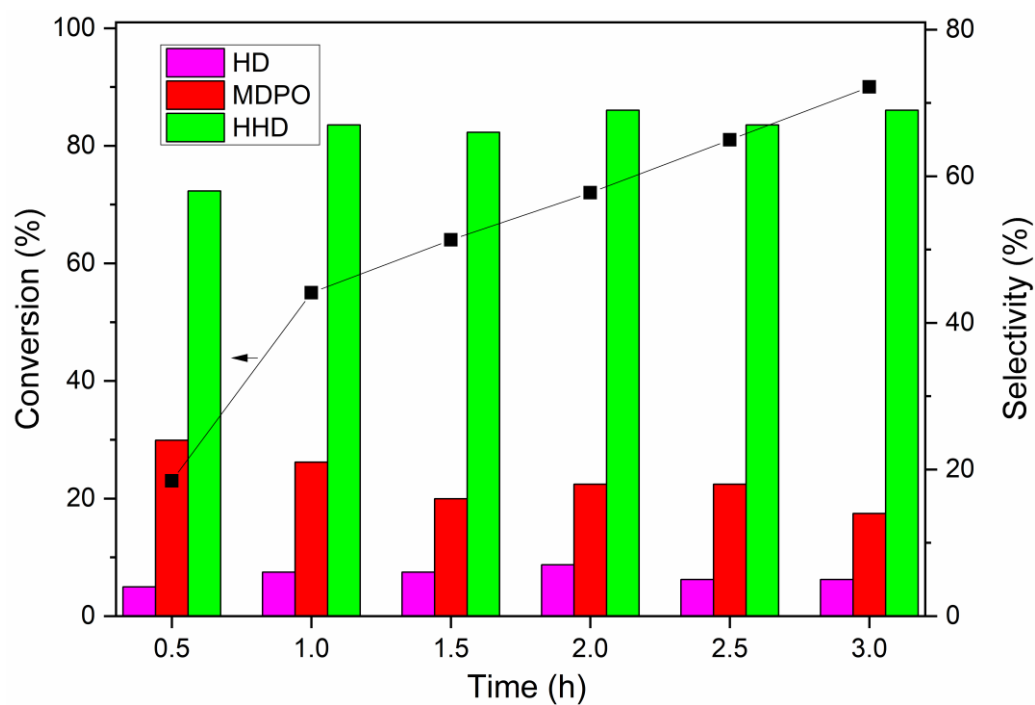

**Figure S1** Effect of reaction time on the hydrogenation of BHMf on Rh/C.

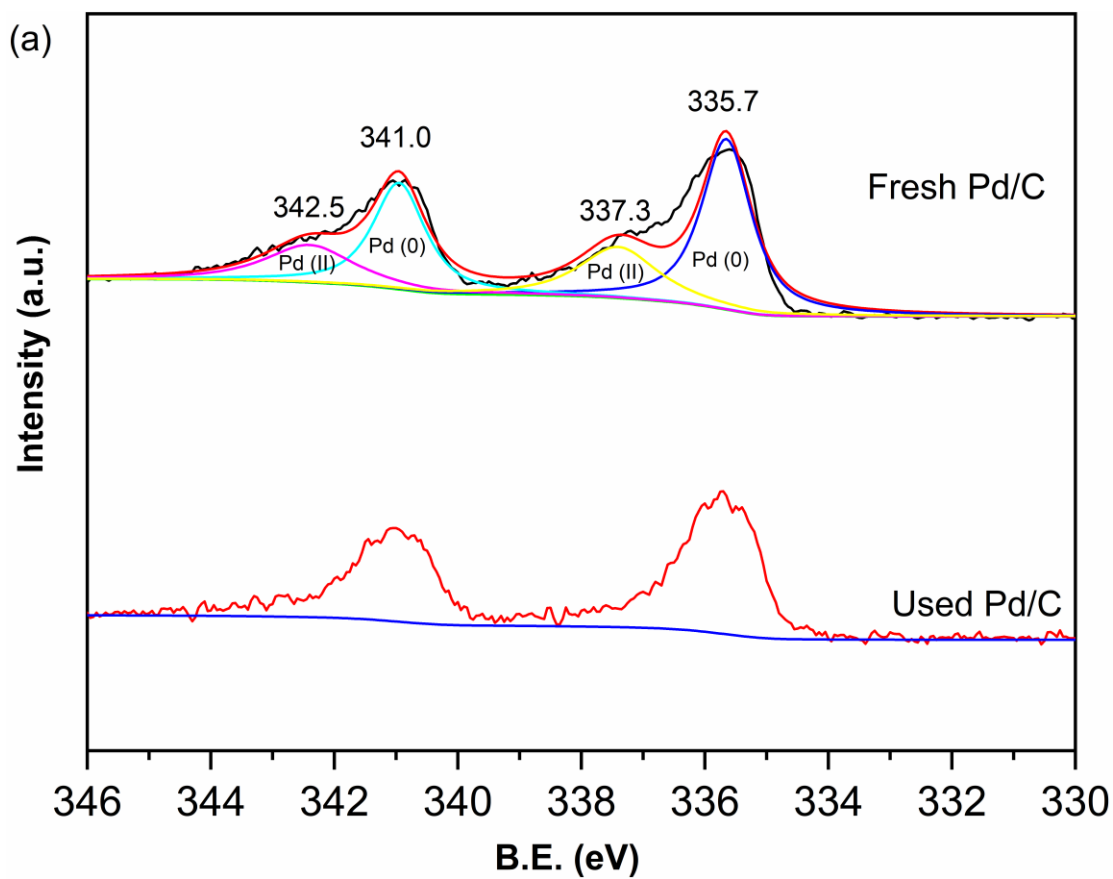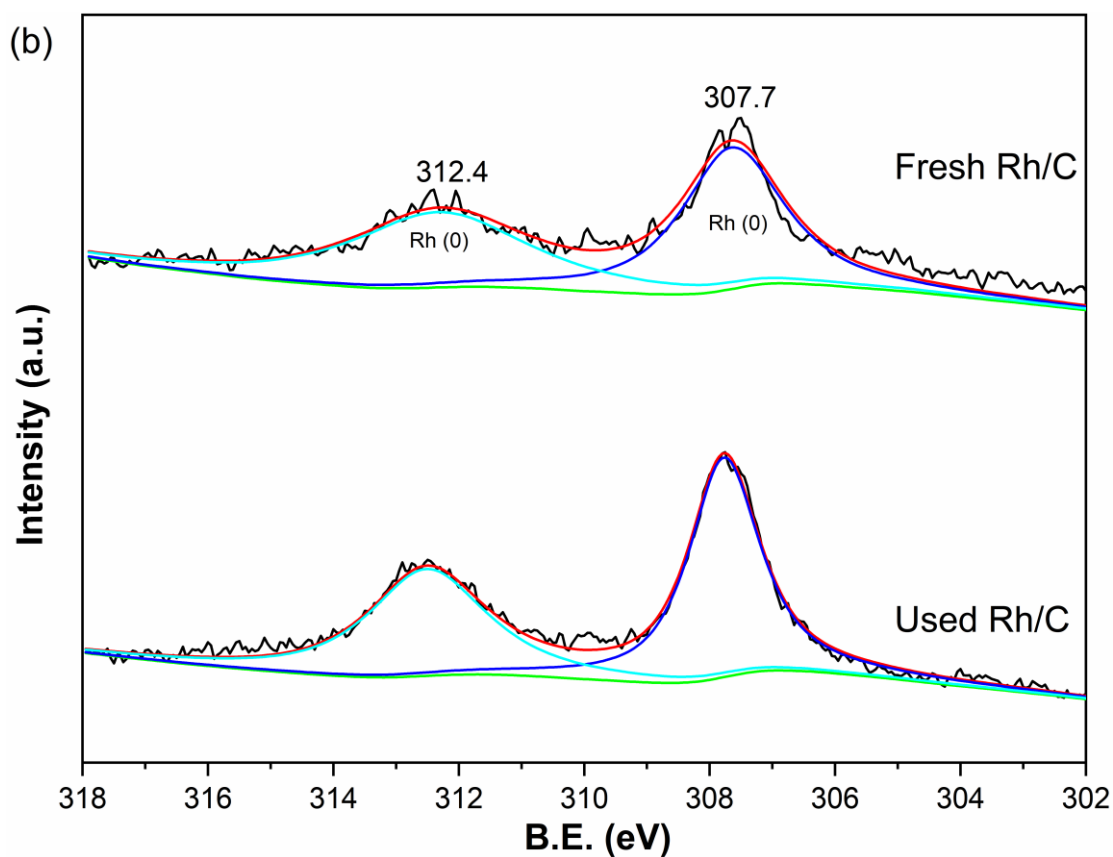

**Figure S2** The XPS spectra for Rh and Pd on fresh and used Pd/C (a) and Rh/C (b)

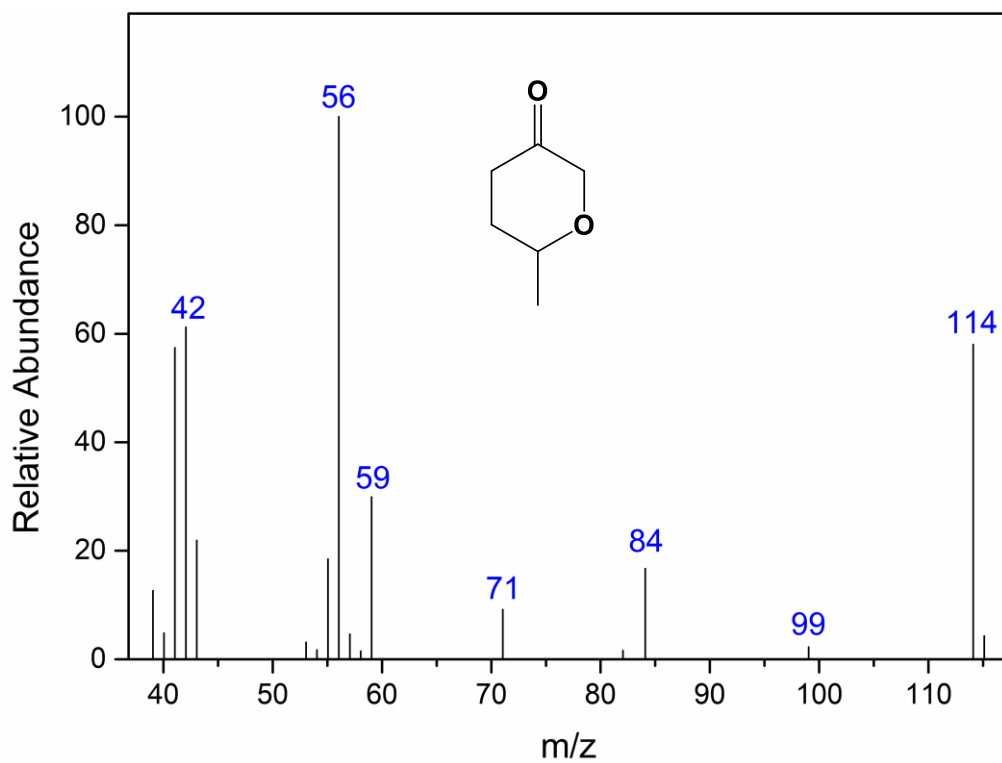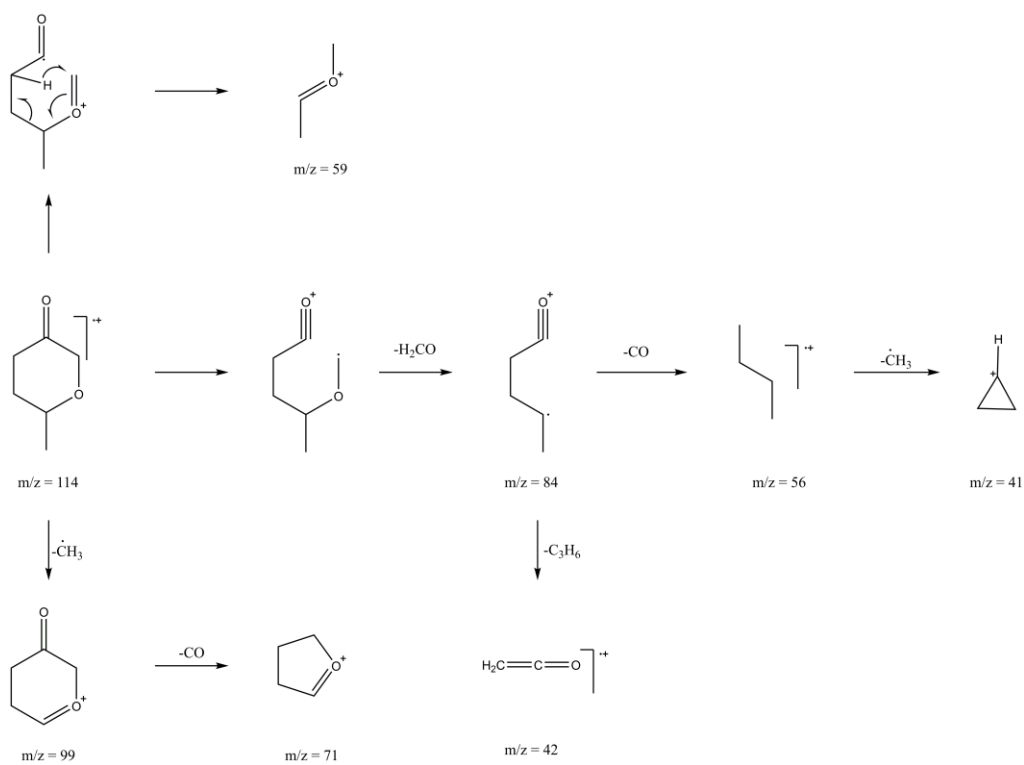

**Figure S3** The mass spectra and ion fragments for MDPO.

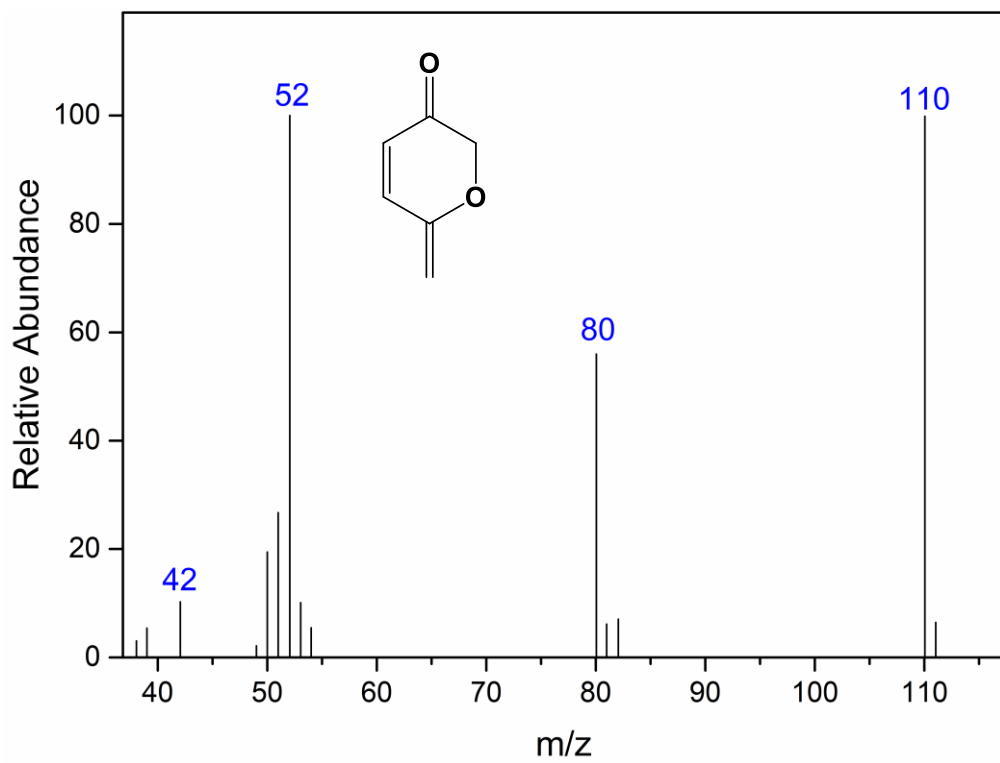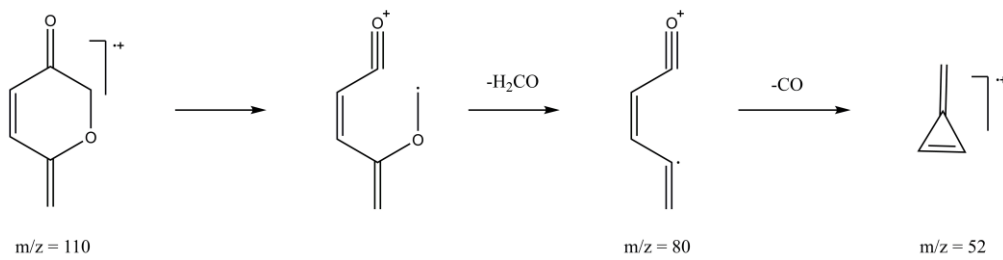

**Figure S4** The mass spectra and ion fragments for MEPO.

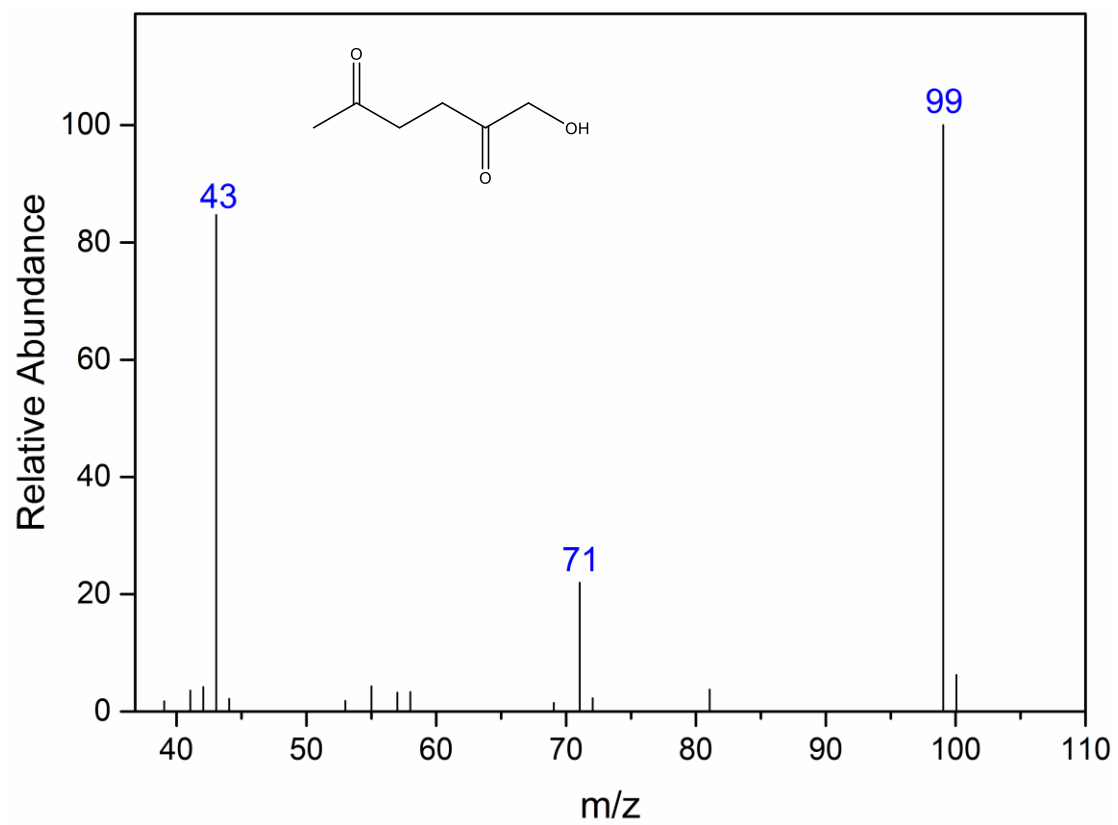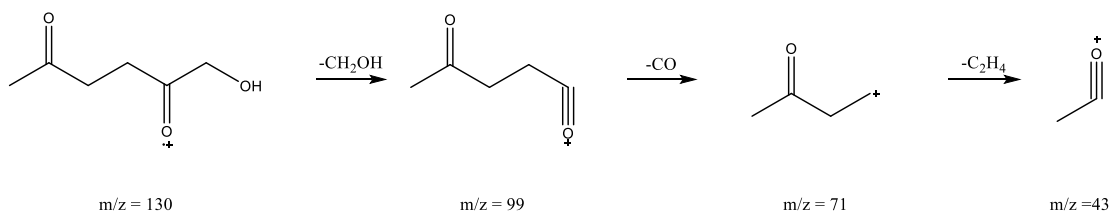

**FigureS5** The mass spectra and ion fragments for HHD.



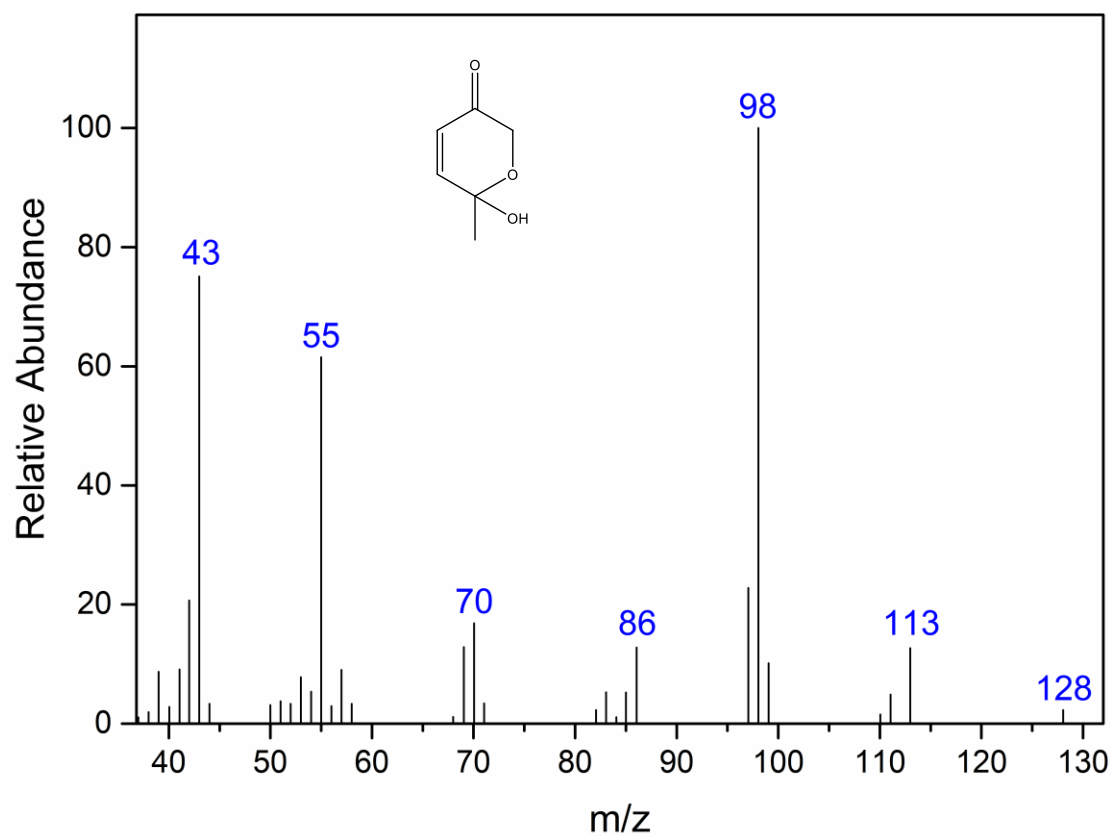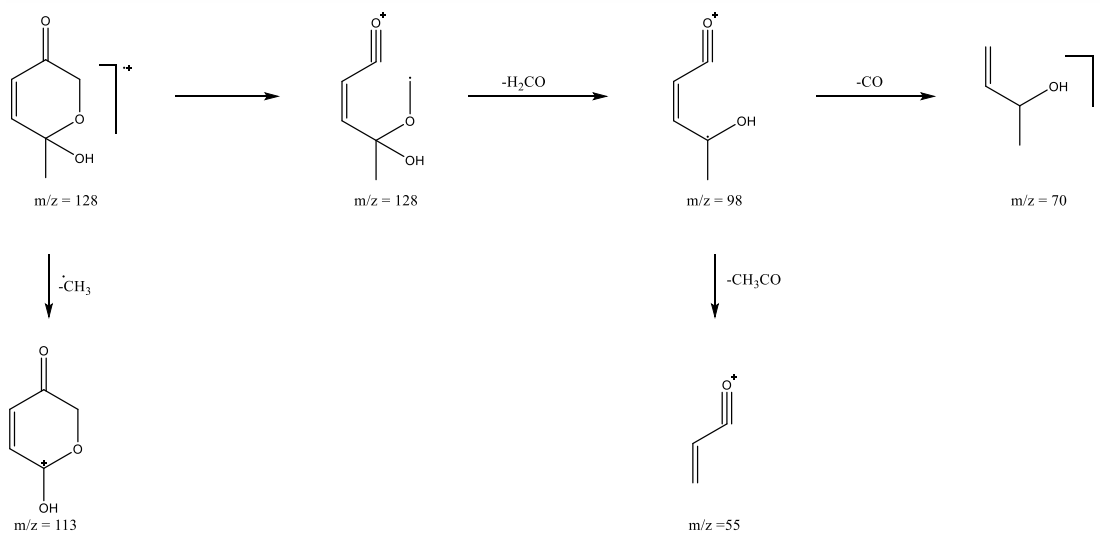

**FigureS6** The mass spectra and ion fragments for HMPO.

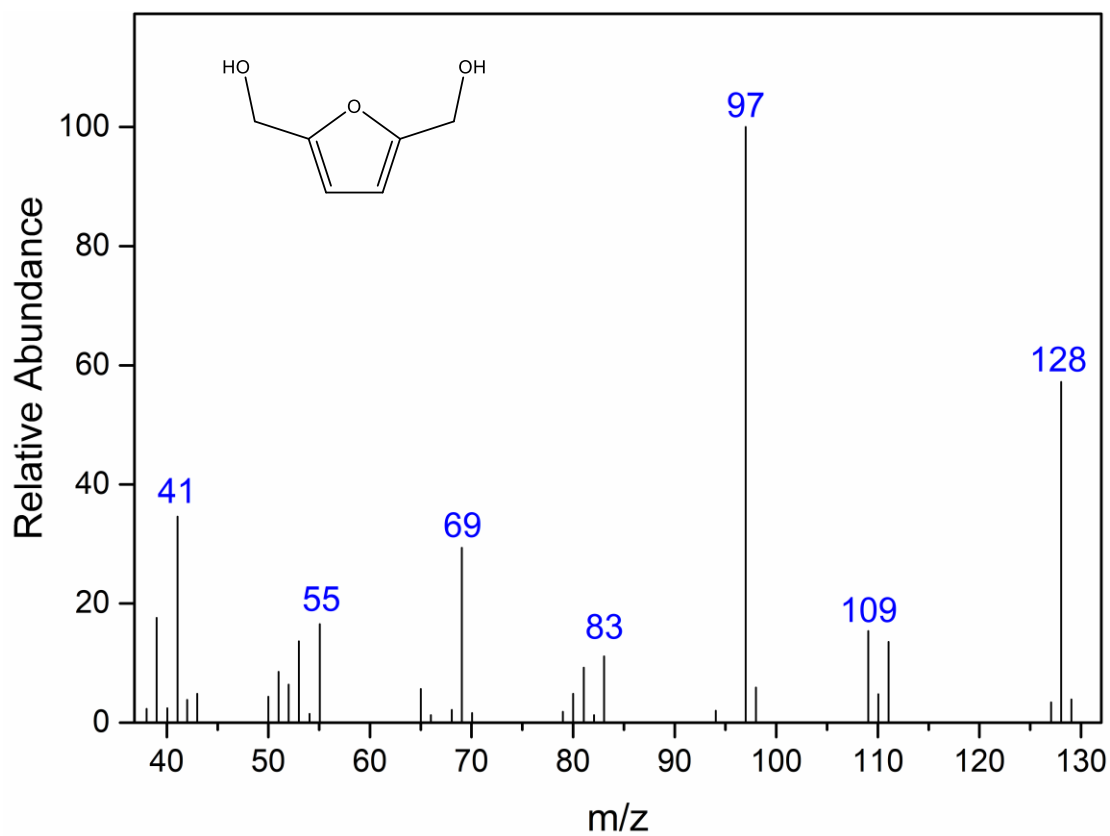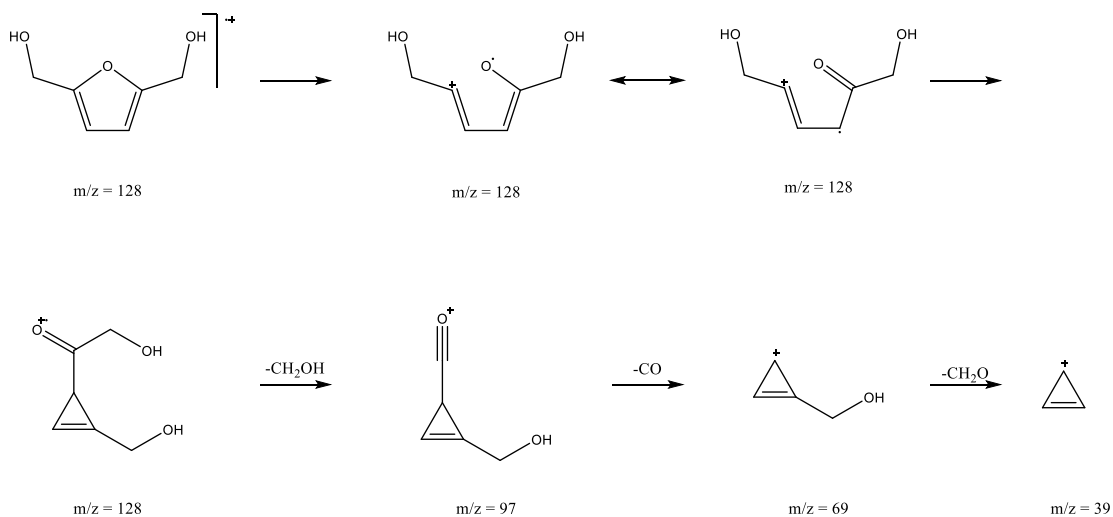

**FigureS7** The mass spectra and ion fragments for BHMF

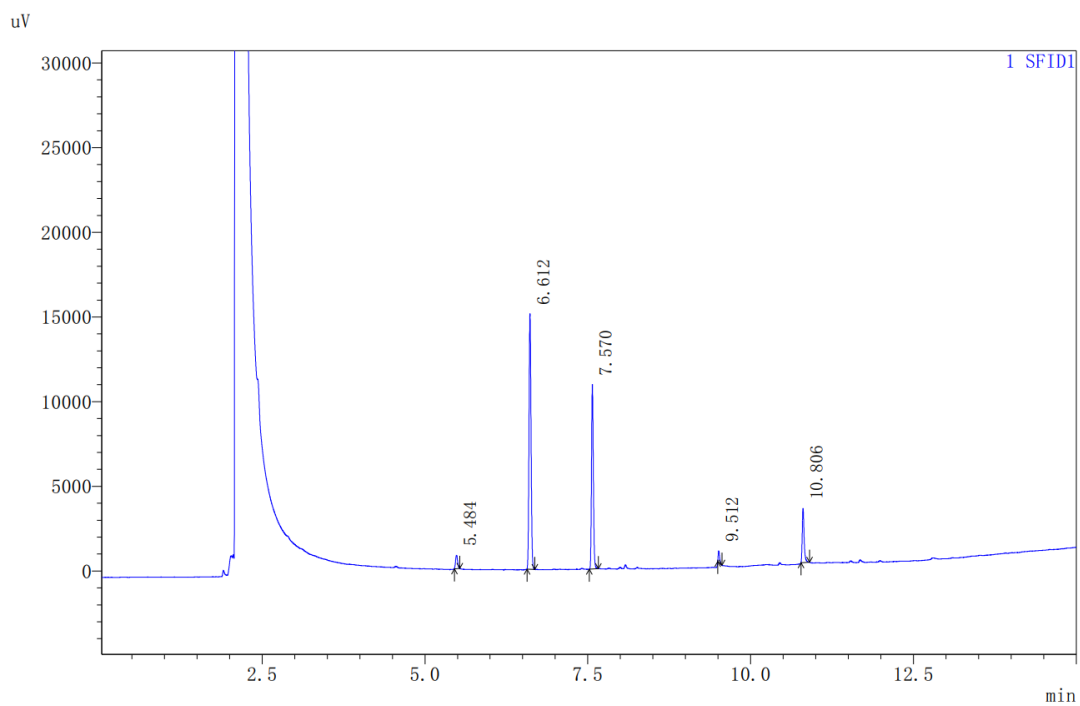

**FigureS8** The GC trace for hydrogenation of BHMf on Pd/C (t = 6.61 min, internal standard; t = 7.57 min, MDPO; t=10.81 HHD).

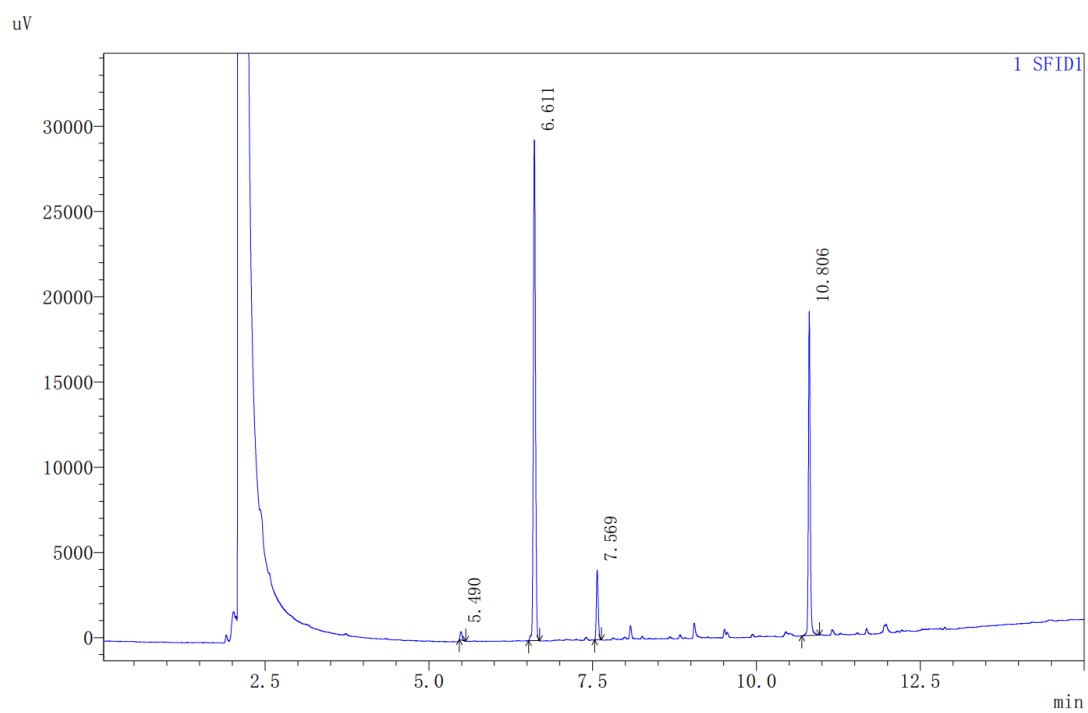

**FigureS9** The GC trace for hydrogenation of BHMf on Rh/C (t = 6.61 min, internal standard; t = 7.57 min, MDPO; t=10.81 HHD).

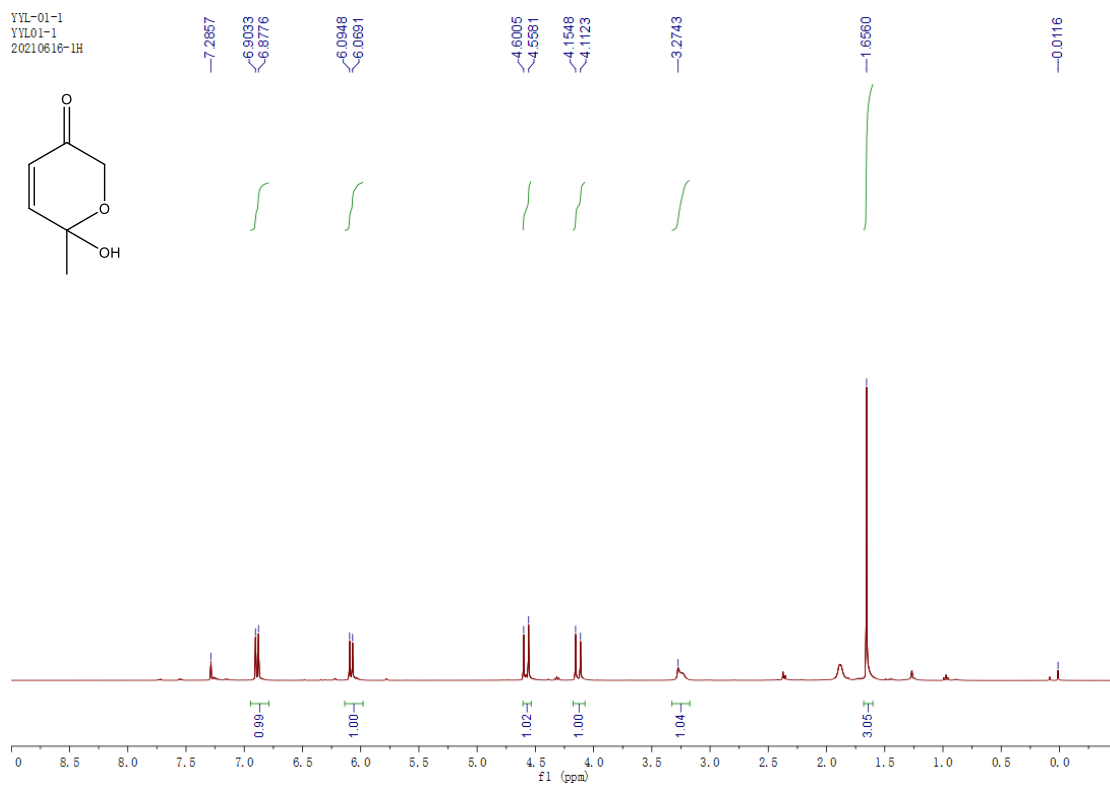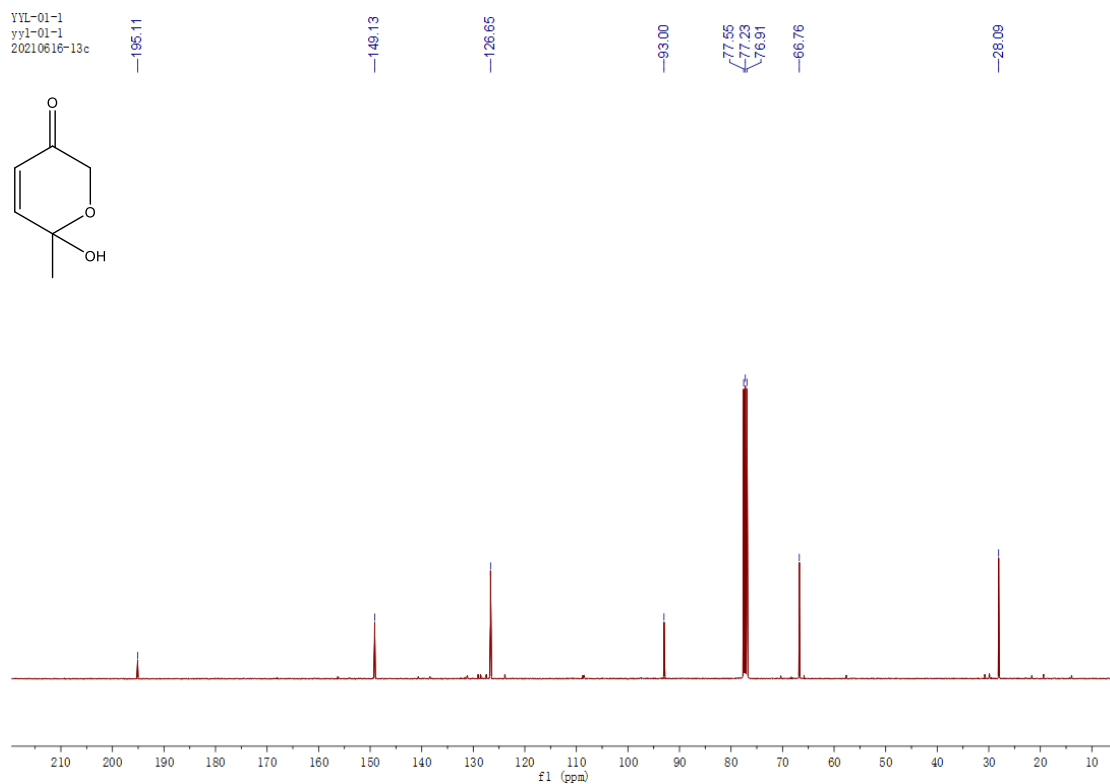

Figure S10 The  $^1\text{H}$  and  $^{13}\text{C}$  NMR spectra for HMPO.

YYL-01-B. 5. fid  
YYL-01-B  
20211206-1H

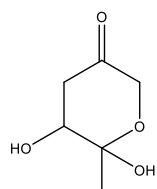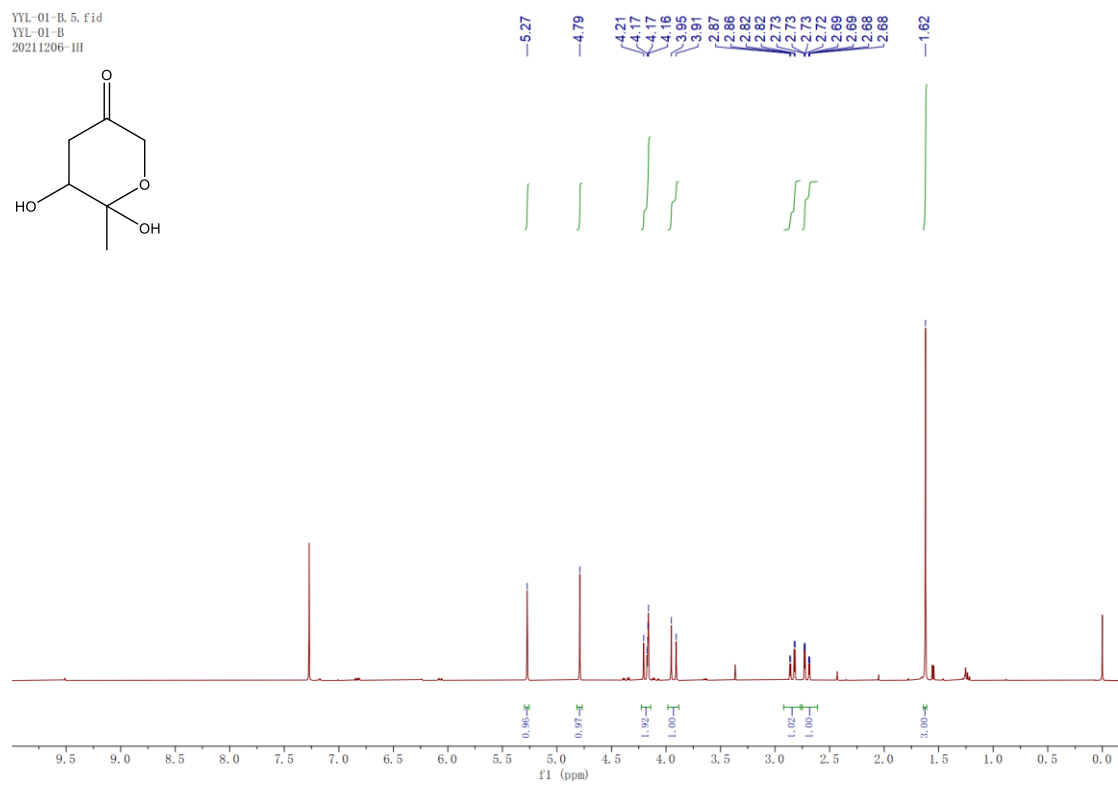

YYL-01-B. 2. fid  
yy1-01-B  
20211206-13c

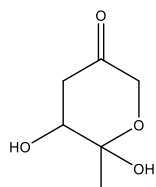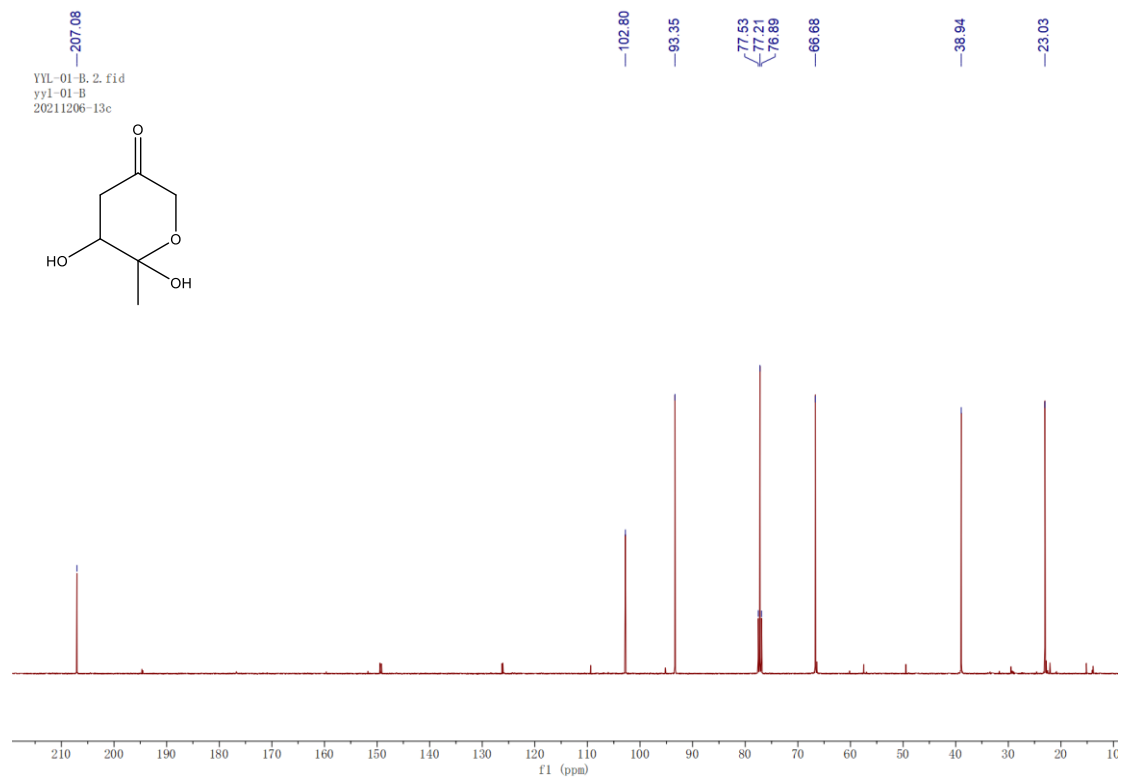

Figure S11 The  $^1\text{H}$  and  $^{13}\text{C}$  NMR spectra for DHDOP.

YYL-04-02  
YYL04-2  
20210527-1H

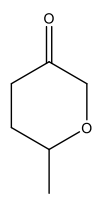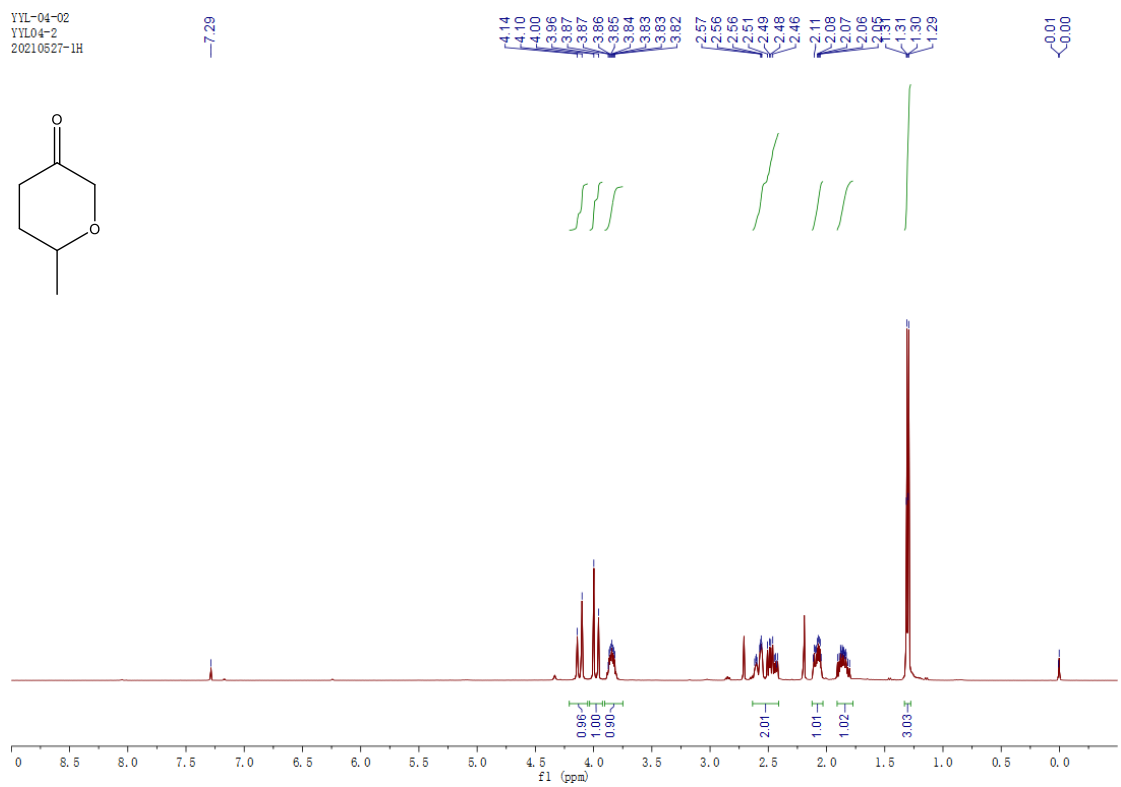

YYL-04-02  
yy1-04-07-C  
20210527-13c

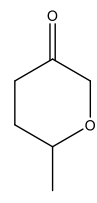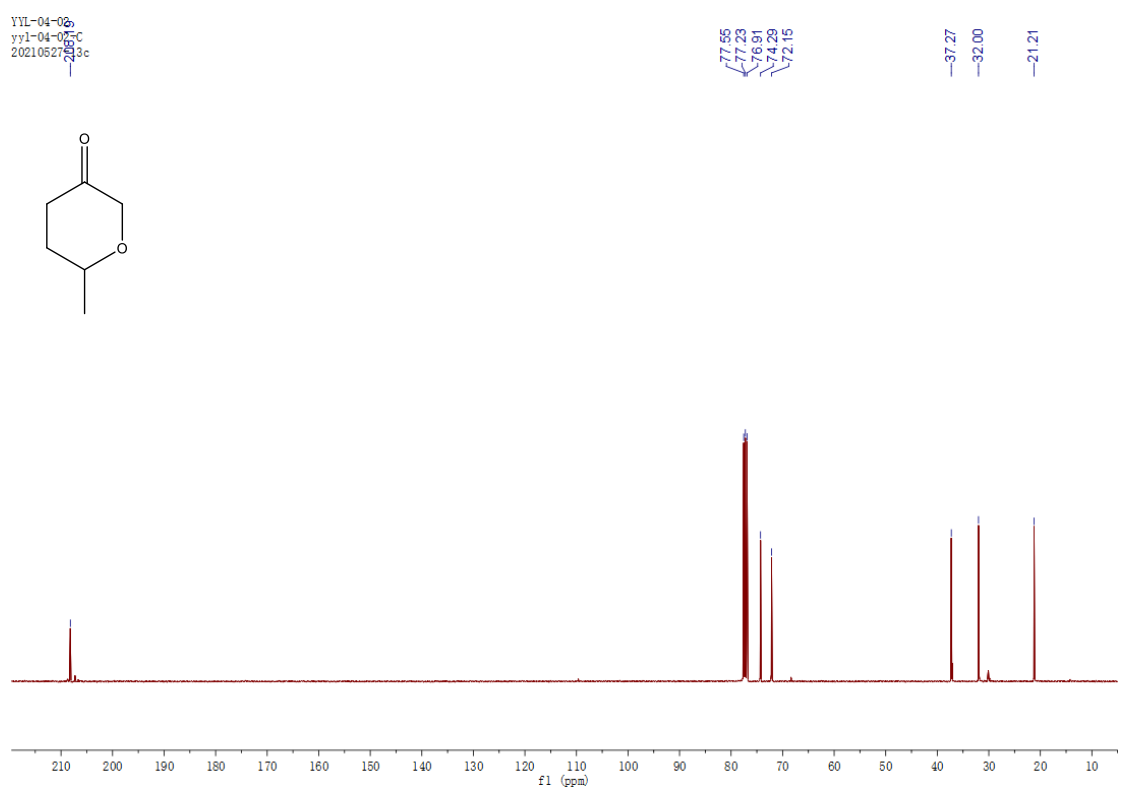

Figure S12 The <sup>1</sup>H and <sup>13</sup>C NMR spectra for MDPO.

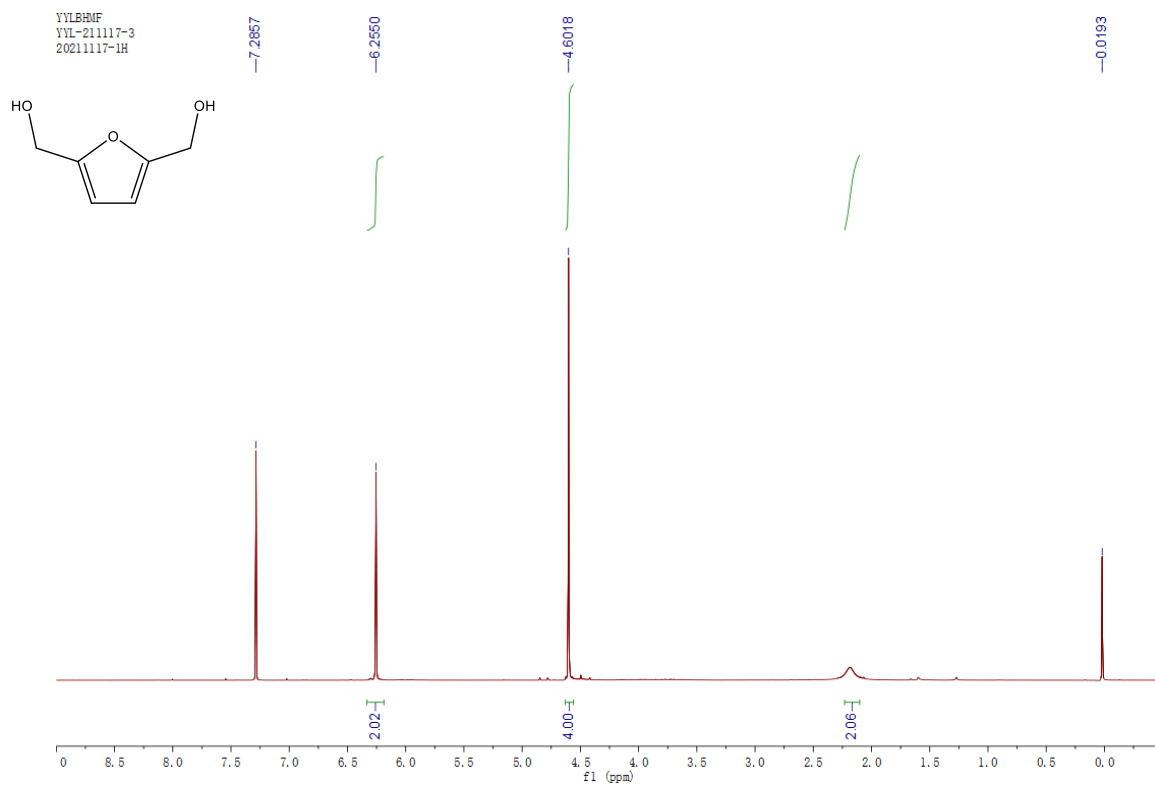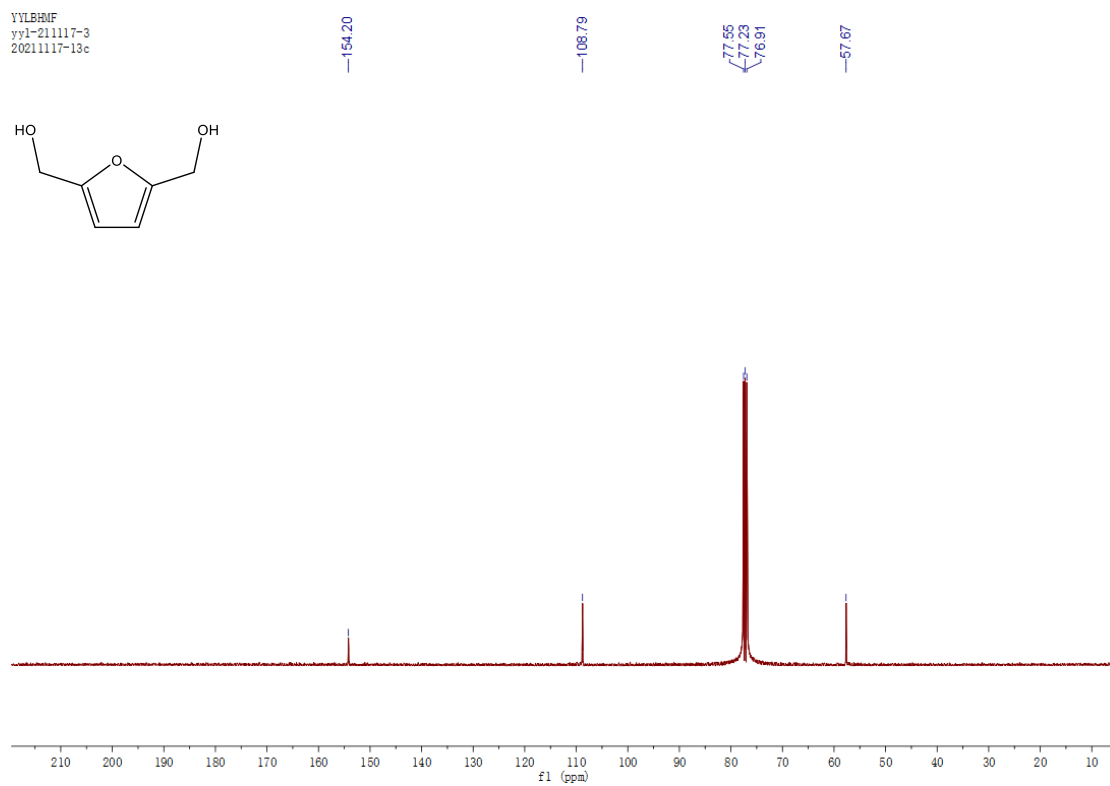

Figure S13 The  $^1\text{H}$  and  $^{13}\text{C}$  NMR spectra for BHMF.

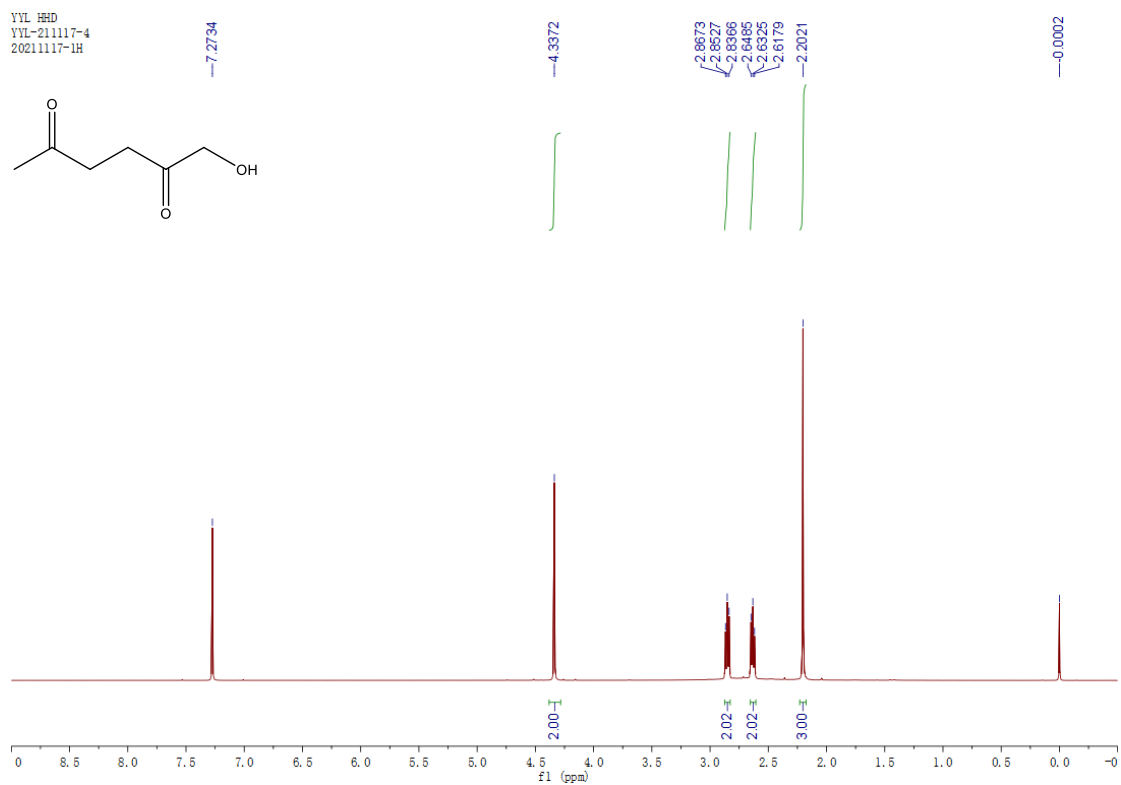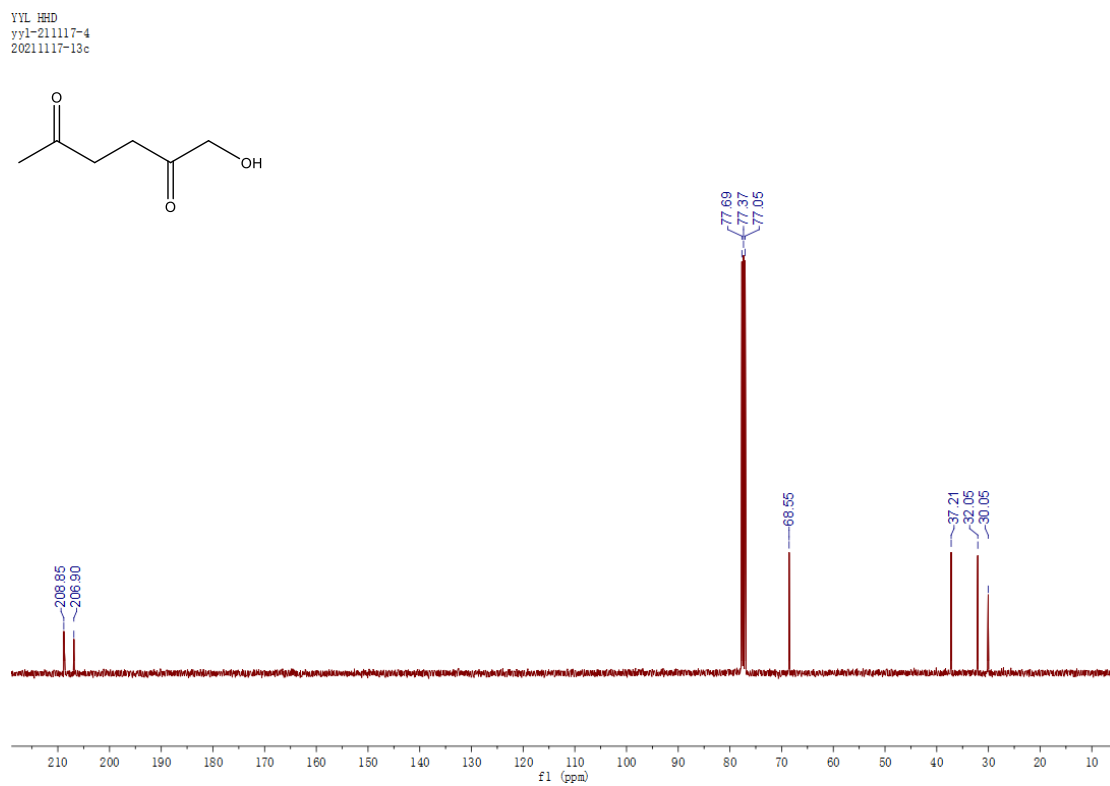

Figure S14 The  $^1\text{H}$  and  $^{13}\text{C}$  NMR spectra for HHD.
